# Supplementary material for: A study of the dynamical characteristics of inertia–gravity waves in the Antarctic mesosphere combining the PANSY radar and a non-hydrostatic general circulation model
Source: Copernicus journal article supplement (doi:10.5194/acp-19-3395-2019), 2019-03-18
Supplement: Supplementary file 1 [file acp-19-3395-2019-supplement.pdf]

Supplement of Atmos. Chem. Phys., 19, 3395–3415, 2019  
<https://doi.org/10.5194/acp-19-3395-2019-supplement>  
© Author(s) 2019. This work is distributed under  
the Creative Commons Attribution 4.0 License.

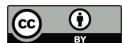

*Supplement of*

**A study of the dynamical characteristics of inertia–gravity waves in the Antarctic mesosphere combining the PANSY radar and a non-hydrostatic general circulation model**

**Ryosuke Shibuya and Kaoru Sato**

*Correspondence to:* Ryosuke Shibuya (shibuyar@jamstec.go.jp)

The copyright of individual parts of the supplement might differ from the CC BY 4.0 License.

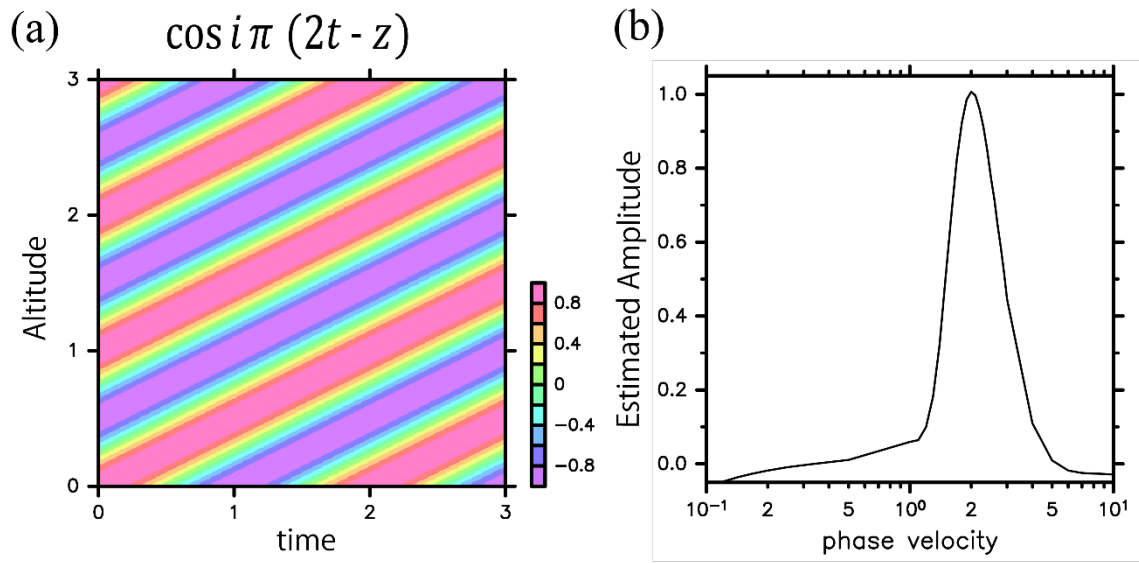

S1. (a) A time-height section of  $\cos i\pi(2z - t)$ . (b) the estimated wave amplitude of  $\cos i\pi(2z - t)$  as a function of the vertical phase velocity.
